# Supplementary material for: Global 30-m seamless data cube (2000–2022) of land surface reflectance generated from Landsat-5,7,8,9 and MODIS Terra constellations
Source: Copernicus journal article supplement (doi:10.5194/essd-2024-178), 2024-06-17
Supplement: Supplementary file [file essd-2024-178-AC4-supplement.pdf]

We would like to express our gratitude to the editor and reviewers for their efforts in handling and commenting on our manuscript. We highly appreciate the insightful and helpful feedback, which has significantly helped improve our manuscript. Below, we provide detailed responses along with the suggested changes to our manuscript.

## Response to Reviewer #1's comments

### General comments

This paper presents the development of a global 30-m seamless data cube by fusing Landsat and MODIS data, building on the authors' previous methods. This work is highly valuable for future applications requiring fine-resolution time series data. Despite the numerous algorithms developed for fusing Landsat and MODIS data or filling gaps in Landsat data, no global datasets generated by these technologies are currently available. However, the paper has several issues that need to be addressed.

We sincerely appreciate your professional review and insightful comments on our manuscript. Your feedback has been invaluable in helping us improve our article. We have made extensive revisions to our previous draft, and our detailed point-by-point responses are listed below. The line numbers mentioned below correspond to the revised manuscript with the changes highlighted.

### Specific comments

1. Page 3, Line 70: For Landsat interpolation methods, there are techniques that do not require numerous clear-sky observations. For instance, the nearest similar pixel interpolator method only needs one clear-sky observation.

**Response 1:** Thank you for your comment. We have added the descriptions of common interpolation methods and revised the related content in our manuscript accordingly.

**Changes in manuscript:** Lines 69-75, revised the content

*“Landsat interpolation methods also provide the capability to generate seamless synthetic Landsat images (Brooks et al., 2012; Malambo and Heatwole, 2016; Yan and Roy, 2018, 2020; Zhu et al., 2015b). Linear interpolation is commonly employed to address missing values in Landsat time series (Defourny et al., 2019; Inglada et al., 2017; Tran et al., 2022), though it may not be highly effective for applications*

*like land cover classification (Che et al., 2024). To improve performance, more sophisticated interpolation methods have been developed (Brooks et al., 2012; Malambo and Heatwole, 2016; Yan and Roy, 2018; Zhou et al., 2022; Zhu et al., 2015b). Nevertheless, a significant limitation of these methods is their dependence on numerous clear-sky Landsat observations for accurate time series estimation (Chen et al., 2021; Zhu et al., 2015b).”*

2. Introduction: Before the last paragraph, the authors should discuss the current research gap. Specifically, they should explain why a full-chain processing framework and such fused data are necessary. Additionally, they should outline the challenges users face when using current methods to produce data independently.

**Response 2:** Thank you for your comment. We have added sentences to discuss the current research gap in our manuscript.

**Changes in manuscript:** Lines 96-101, added

*“To the best of our knowledge, there is currently no global, 30-m, and seamless dataset of land surface reflectance generated by fusing Landsat and MODIS products available to the community. Although there have been numerous studies dedicated to develop algorithms for missing data reconstruction and multi-sensor data fusion (Shen et al., 2015; Zhu et al., 2018), unified and generalized frameworks for effective and efficient Landsat-MODIS data fusion at global scales have not yet been explored extensively. To address this need, in this study, we ...”*

3. Page 11, Figure 3: When performing harmonization, was Landsat upsampled to the resolution of MODIS? Figure 3 suggests that both datasets have the same resolution. A linear transformation model was used; how do the authors address the issue when the linear model is not statistically significant?

**Response 3:** Thank you for your comment.

- (a) We resampled MODIS data to match the 30-m spatial resolution of Landsat, as describe in Lines 189-191. This resampling operation helps streamline subsequent processing steps, and we found that its computational costs are relatively negligible.

(b) Indeed, a single linear model is insufficient for large-scale applications. Therefore, we construct multiple linear models for each local small area separately (e.g., 64×64 image patch), to better account for spatial heterogeneity. We also used an overlapping mechanism to mitigate spatial inconsistencies between neighboring image patches. The MODIS-Landsat harmonization serves to enhance the consistency between paired MODIS-Landsat images, and thereby improve the reconstruction accuracy of subsequent gap filling and spatiotemporal fusion.

**Changes in manuscript:** Lines 279-281, added

*“This approach employs multiple regional transformation models to better account for material-dependent spectral characteristics that vary across regions and uses an overlapping mechanism to enhance spatial consistency between neighboring image patches.”*

4. Major Differences Between uROBOT and ROBOT Models: What are the primary differences between the uROBOT model and the previously developed ROBOT model by the authors?

**Response 4:** Thank you for your comment. There are two major differences between uROBOT and ROBOT models: (a) uROBOT has an extra penalty term  $|F_p^+ - D_F^+ \alpha|_2^2$ , which allows it to exploit partly observed Landsat image  $F_p^+$  to better reconstruct the unobserved/cloud contaminated part. The uROBOT model can do gap filling and spatiotemporal fusion in a unified manner. (b) As indicated in Eq. 8, uROBOT utilizes an interpolated Landsat image in the temporal continuity penalty term  $|F_{interp} - D_F \alpha|_2^2$ , while ROBOT uses the cloud-free Landsat image acquired nearest to prediction phase. This modification helps to improve the performance of uROBOT.

**Changes in manuscript:** Lines 336-338, added

*“Additionally, uROBOT utilizes the interpolated Landsat image  $F_{interp}$  in the temporal continuity penalty term, which further improves the performance of uROBOT.”*

5. Accuracy of the Time Series Model in Eq. 6: The accuracy of the time series model in Equation 6 could be affected by the time interval of the data. In cloudy regions, if the data is too sparse, is the result reliable? How do the authors address diverse changes when the data is sparse?

**Response 5:** Thank you for your comment. We agree that the reconstruction accuracy of SDC will decrease if the data is too sparse in cloudy regions. On one hand, we will employ multiple years of Landsat and MODIS time series images, to make sure there are sufficient input data. On the other hand, as indicated in Eq. 8, the uROBOT model has five constraints/priors:

$$\min_{\alpha} |C_p - D_C \alpha|_2^2 + \lambda |\alpha|_1 + \beta (|F_{interp} - D_F \alpha|_2^2) + \mu (|F_p^+ - D_F^+ \alpha|_2^2) \quad (8)$$

(i)  $|C_p - D_C \alpha|_2^2$ ,  $\alpha$  should be consistent with the MODIS representation;

(ii) residual distribution  $\hat{F}_p = D_F \alpha + (C_p - D_C \alpha)$ , the low-frequency components of  $\hat{F}_p$  should be consistent with  $C_p$ ;

(iii)  $|\alpha|_1$ ,  $\alpha$  should be sparse;

(iv)  $|F_{interp} - D_F \alpha|_2^2$ ,  $\alpha$  should be consistent with the representation of  $F_{interp}$ , to ensure temporal continuity;

(v)  $|F_p^+ - D_F^+ \alpha|_2^2$ ,  $\alpha$  should be consistent with the representation of observed part  $F_p^+$ .

If the input data is still too sparse, the constraints (ii) and (iv) will function and make sure that the estimated results are consistent with  $C_p$  and no worse than the interpolated images  $F_{interp}$ .

**Changes in manuscript:** Lines 346-348, added

*“In regions with frequent cloud cover, the scarcity of cloud-free observations can pose a challenge. To address this, the temporal continuity constraint  $\beta |F_{interp} - D_F \alpha|_2^2$  and the residual distribution in **Equation (9)** ensure that our estimations are consistent with  $C_p$  and are at least as accurate as the interpolated results  $F_{interp}$ .*

6. Eq. 7: The coefficients from MODIS are used for Landsat. This approach may be acceptable if the land is homogeneous, but it lacks a clear mechanism for complex landscapes. Landsat pixels have different temporal dependencies compared to coarse pixels. If this issue affects the reliability of the final product, the end users should be notified.

**Response 6:** Thank you for your comment. Indeed, directly transferring the coefficients from MODIS in Eq. 6 would not obtain satisfactory results. In this study, the coefficients  $\alpha$  were obtained by solving the optimization problem in Eq. 8, as presented in Response 5. The five constraints in Eq. 8 will function jointly, utilizing information from both MODIS and Landsat time series images to facilitate the reconstruction of unobserved Landsat images.

Using 500-m MODIS data to reconstruct 30-m Landsat image is an under-determined problem. There are certainly extreme conditions, such as some complex landscapes and diverse changes. If the information provided in the input data is incomplete, it will be theoretically impossible to accurately reconstruct 30-m Landsat images by using 500-m MODIS data. We have revised the content in Section 5.3 to acknowledge readers about this issue.

**Changes in manuscript:** Lines 600-608, revised the content to acknowledge readers about the above-mentioned issues.

*“The SDC is not equivalent to actual daily 30-m Earth observations data. It is an estimation based on Landsat and MODIS time series observations. Reconstructing missing Landsat data is an under-determined problem, meaning there can be infinitely many possible solutions (Shen et al., 2015). By using 500-m MODIS images as “guidance” and applying the constraints presented in Equation (8), we can narrow down the solution space and make more accurate estimations. However, achieving 100% accuracy is not feasible since the information provided in the input data is usually incomplete. Additionally, the effective spatial resolution of MODIS observations changes significantly due to the variations of view angles (Pahlevan et al., 2017). Even after BRDF normalization and temporal smoothing, these effects cannot be perfectly mitigated. The effective temporal resolution of SDC depends on the quality of the input Landsat and MODIS data, which can vary in space and time.”*

7. Eq. 9: The equation redistributes the residual to handle land cover changes, but the residual is at a coarse scale. How do the authors address changes at the fine pixel scale?

**Response 7:** Thank you for your comment. The regularization terms in Eq. 8 contribute to handle land cover changes at the fine pixel scale. The MODIS consistency term, the interpolated  $F_{interp}$  consistency term, and the partially observed  $F_p^+$  consistency term help predict step changes and gradual changes. For ephemeral changes, if there are Landsat images in the time-series input similar to the target Landsat image, the MODIS consistency term and the partially observed  $F_p^+$  consistency term can help identify

these similar images and use them to predict ephemeral land cover changes. If there are no similar Landsat images available, the residual distribution in Eq. 9 will function, distributing coarse-resolution residual information as a compromised solution.

However, there are certain situations that the information provided in the input Landsat and MODIS data is incomplete for accurate reconstruction of unobserved 30-m Landsat images. We have revised the content in Section 5.3 to inform readers about this issue.

**Changes in manuscript:** Line 342, added

*“All the constraint terms in Equation (8) contribute to addressing gradual and step changes.”*

Lines 600-608, added

*“The SDC is not equivalent to actual daily 30-m Earth observations data. It is an estimation based on Landsat and MODIS time series observations. Reconstructing missing Landsat data is an under-determined problem, meaning there can be infinitely many possible solutions (Shen et al., 2015). By using 500-m MODIS images as “guidance” and applying the constraints presented in Equation (8), we can narrow down the solution space and make more accurate estimations. However, achieving 100% accuracy is not feasible since the information provided in the input data is usually incomplete. Additionally, the effective spatial resolution of MODIS observations changes significantly due to the variations of view angles (Pahlevan et al., 2017). Even after BRDF normalization and temporal smoothing, these effects cannot be perfectly mitigated. The effective temporal resolution of SDC depends on the quality of the input Landsat and MODIS data, which can vary in space and time. ”*

8. Page 15, Line 355: The three accuracy metrics mentioned cannot adequately assess the spatial context preserved by the fused images. Some spatial metrics, such as edge features (see examples in <https://doi.org/10.1016/j.rse.2022.113002>), should be presented.

**Response 8:** Thank you for your comment. We have added results calculated using Robert’s edge spatial features in the accuracy validation.

**Changes in manuscript:** Lines 378-384, added

“using standard metrics, such as Correlation Coefficient (CC), Root Mean Square Error (RMSE), Mean Absolute Error (MAE), rMAE (MAE normalized by true surface reflectance values), and Robert’s edge (Edge) spatial features (Zhu et al., 2022). We calculated the normalized difference of the Edge spatial features between reconstructed image and actual Landsat image. The normalized metric values range from -1 to 1, indicating the under- or over-estimate of spatial details. The average normalized metric value of pixels with Edge value higher than 90th percentile in the actual Landsat image was used to represent the spatial accuracy of the reconstructed image (Zhu et al., 2022).”

Revised the content in Tables 4 and 6

**Table 4: Accuracy of SDC reconstruction at the 425 global test sites (ETM+\*: scan-line corrector failure).**

| Band<br>(mean<br>±std) | 2001<br>(TM and ETM+) |                 |                 |                  | 2004<br>(TM and ETM+*) |                 |                 |                  | 2012<br>(ETM+*) |                 |                 |                  | 2021<br>(ETM+* and OLI) |                 |                 |                  |
|------------------------|-----------------------|-----------------|-----------------|------------------|------------------------|-----------------|-----------------|------------------|-----------------|-----------------|-----------------|------------------|-------------------------|-----------------|-----------------|------------------|
|                        | RMSE                  | MAE             | CC              | Edge             | RMSE                   | MAE             | CC              | Edge             | RMSE            | MAE             | CC              | Edge             | RMSE                    | MAE             | CC              | Edge             |
| Blue                   | 0.017<br>±0.009       | 0.012<br>±0.006 | 0.745<br>±0.063 | -0.280<br>±0.108 | 0.016<br>±0.009        | 0.012<br>±0.006 | 0.771<br>±0.063 | -0.264<br>±0.105 | 0.016<br>±0.010 | 0.012<br>±0.006 | 0.795<br>±0.053 | -0.250<br>±0.099 | 0.015<br>±0.007         | 0.011<br>±0.005 | 0.792<br>±0.075 | -0.245<br>±0.093 |
| Green                  | 0.017<br>±0.008       | 0.013<br>±0.005 | 0.806<br>±0.053 | -0.215<br>±0.098 | 0.016<br>±0.008        | 0.012<br>±0.006 | 0.832<br>±0.055 | -0.205<br>±0.096 | 0.015<br>±0.009 | 0.011<br>±0.006 | 0.844<br>±0.050 | -0.189<br>±0.087 | 0.016<br>±0.008         | 0.012<br>±0.005 | 0.863<br>±0.058 | -0.186<br>±0.080 |
| Red                    | 0.019<br>±0.008       | 0.014<br>±0.006 | 0.840<br>±0.052 | -0.198<br>±0.098 | 0.018<br>±0.008        | 0.013<br>±0.006 | 0.866<br>±0.053 | -0.188<br>±0.093 | 0.018<br>±0.009 | 0.013<br>±0.006 | 0.874<br>±0.052 | -0.179<br>±0.084 | 0.018<br>±0.008         | 0.013<br>±0.005 | 0.891<br>±0.059 | -0.174<br>±0.081 |
| NIR                    | 0.029<br>±0.008       | 0.021<br>±0.006 | 0.891<br>±0.027 | -0.178<br>±0.083 | 0.027<br>±0.009        | 0.020<br>±0.006 | 0.910<br>±0.024 | -0.164<br>±0.076 | 0.027<br>±0.009 | 0.020<br>±0.007 | 0.912<br>±0.025 | -0.157<br>±0.068 | 0.028<br>±0.009         | 0.021<br>±0.007 | 0.922<br>±0.029 | -0.154<br>±0.061 |
| SWIR1                  | 0.025<br>±0.003       | 0.018<br>±0.002 | 0.834<br>±0.022 | -0.180<br>±0.092 | 0.022<br>±0.004        | 0.016<br>±0.003 | 0.851<br>±0.037 | -0.163<br>±0.082 | 0.022<br>±0.004 | 0.016<br>±0.003 | 0.867<br>±0.037 | -0.154<br>±0.071 | 0.022<br>±0.003         | 0.016<br>±0.003 | 0.887<br>±0.033 | -0.163<br>±0.068 |
| SWIR2                  | 0.018<br>±0.003       | 0.014<br>±0.002 | 0.810<br>±0.045 | -0.204<br>±0.095 | 0.016<br>±0.003        | 0.012<br>±0.002 | 0.841<br>±0.061 | -0.190<br>±0.091 | 0.017<br>±0.004 | 0.012<br>±0.003 | 0.853<br>±0.060 | -0.177<br>±0.080 | 0.016<br>±0.003         | 0.012<br>±0.002 | 0.861<br>±0.058 | -0.167<br>±0.071 |

**Table 6: Cross-comparison results of between the SDC with HLS L30 and S30 products at the 22 MGRS tiles.**

| Band  | Compare SDC with HLS L30 |       |       |        | Compare SDC with HLS S30 |       |       |        |
|-------|--------------------------|-------|-------|--------|--------------------------|-------|-------|--------|
|       | RMSD                     | MAD   | CC    | Edge   | RMSD                     | MAD   | CC    | Edge   |
| Blue  | 0.058                    | 0.014 | 0.892 | -0.217 | 0.059                    | 0.017 | 0.849 | -0.339 |
| Green | 0.055                    | 0.015 | 0.906 | -0.217 | 0.060                    | 0.020 | 0.863 | -0.317 |
| Red   | 0.056                    | 0.017 | 0.920 | -0.214 | 0.060                    | 0.022 | 0.890 | -0.306 |
| NIR   | 0.054                    | 0.023 | 0.924 | -0.218 | 0.059                    | 0.027 | 0.899 | -0.233 |
| SWIR1 | 0.030                    | 0.017 | 0.977 | -0.201 | 0.034                    | 0.022 | 0.971 | -0.154 |
| SWIR2 | 0.025                    | 0.014 | 0.980 | -0.196 | 0.028                    | 0.018 | 0.974 | -0.164 |

9. Tables 4-6: Is the accuracy assessment conducted for each site? The tables only show the mean value. What is the range of these indices?

**Response 9:** Thank you for your comment. The accuracy assessment was conducted for each site, and the metric values presented in Tables 4-6 are averaged over all sites (or sites with the same dominant land cover types). We have added the corresponding standard deviation values to these tables.

**Changes in manuscript:** revised the content in Table 4, added corresponding standard deviation values, as presented in Response 8.

10. Figure 14: The RMSD values in Figure 14 are on a different scale compared to Tables 4-6.

**Response 10:** Thanks for pointing this out. We have corrected the scale of RMSD values in Figure 14.

**Changes in manuscript:** Figure 14, changed the scale of reflectance values from 0-10000 to 0-1, and re-calculated corresponding RMSD values.

|              | Blue   | Green  | Red    | NIR    | SWIR1  | SWIR2  |
|--------------|--------|--------|--------|--------|--------|--------|
| Before       | 0.0087 | 0.0077 | 0.0111 | 0.0215 | 0.0187 | 0.0145 |
| After        | 0.0048 | 0.0055 | 0.0082 | 0.0160 | 0.0151 | 0.0117 |
| Reduce       | 44.8%  | 28.5%  | 26.1%  | 25.7%  | 18.9%  | 19.4%  |
| <b>10SEH</b> |        |        |        |        |        |        |
| Before       | 0.0114 | 0.0122 | 0.0175 | 0.0388 | 0.0344 | 0.0334 |
| After        | 0.0059 | 0.0080 | 0.0107 | 0.0242 | 0.0199 | 0.0194 |
| Reduce       | 47.8%  | 34.3%  | 38.8%  | 37.6%  | 42.0%  | 42.0%  |
| <b>17RKQ</b> |        |        |        |        |        |        |
| Before       | 0.0143 | 0.0158 | 0.0180 | 0.0495 | 0.0270 | 0.0249 |
| After        | 0.0062 | 0.0066 | 0.0112 | 0.0351 | 0.0172 | 0.0157 |
| Reduce       | 56.4%  | 58.1%  | 37.9%  | 29.1%  | 36.1%  | 36.9%  |
| <b>32UNA</b> |        |        |        |        |        |        |
| Before       | 0.0084 | 0.0074 | 0.0098 | 0.0231 | 0.0174 | 0.0143 |
| After        | 0.0044 | 0.0055 | 0.0082 | 0.0158 | 0.0150 | 0.0128 |
| Reduce       | 47.6%  | 25.8%  | 16.3%  | 31.4%  | 13.6%  | 9.9%   |
| <b>36MWS</b> |        |        |        |        |        |        |
| Before       | 0.0189 | 0.0165 | 0.0183 | 0.0317 | 0.0187 | 0.0195 |
| After        | 0.0075 | 0.0072 | 0.0103 | 0.0260 | 0.0123 | 0.0139 |
| Reduce       | 60.1%  | 56.4%  | 43.5%  | 18.0%  | 34.2%  | 28.9%  |
| <b>49SGV</b> |        |        |        |        |        |        |
| Before       | 0.0097 | 0.0113 | 0.0216 | 0.0267 | 0.0407 | 0.0422 |
| After        | 0.0069 | 0.0089 | 0.0164 | 0.0177 | 0.0303 | 0.0312 |
| Reduce       | 29.0%  | 21.4%  | 24.3%  | 33.8%  | 25.5%  | 26.0%  |
| <b>55HCC</b> |        |        |        |        |        |        |

**Figure 14: The mean RMSDs between ETM+ and OLI observations before and after the cross-calibration for six spectral bands at six MGRS tiles.**

11. Table 9: It would be beneficial to include a figure showing examples where only the Seamless Data Cube (SDC) can accurately classify the pixels, whereas other data cannot.



**Response 11:** Thank you for your suggestion. We have added a figure presenting examples where the SDC can correctly distinguish data of different land cover types, while other data sources cannot.

**Changes in manuscript:** Lines 578-580, added

“**Figure 20** shows two examples of land cover classification results, when using SDC can correctly identify land cover types, while other data cannot. The SDC time series preserves the temporal information of the original Landsat data and remains stable when Landsat observations are sparse.”

Added a figure,

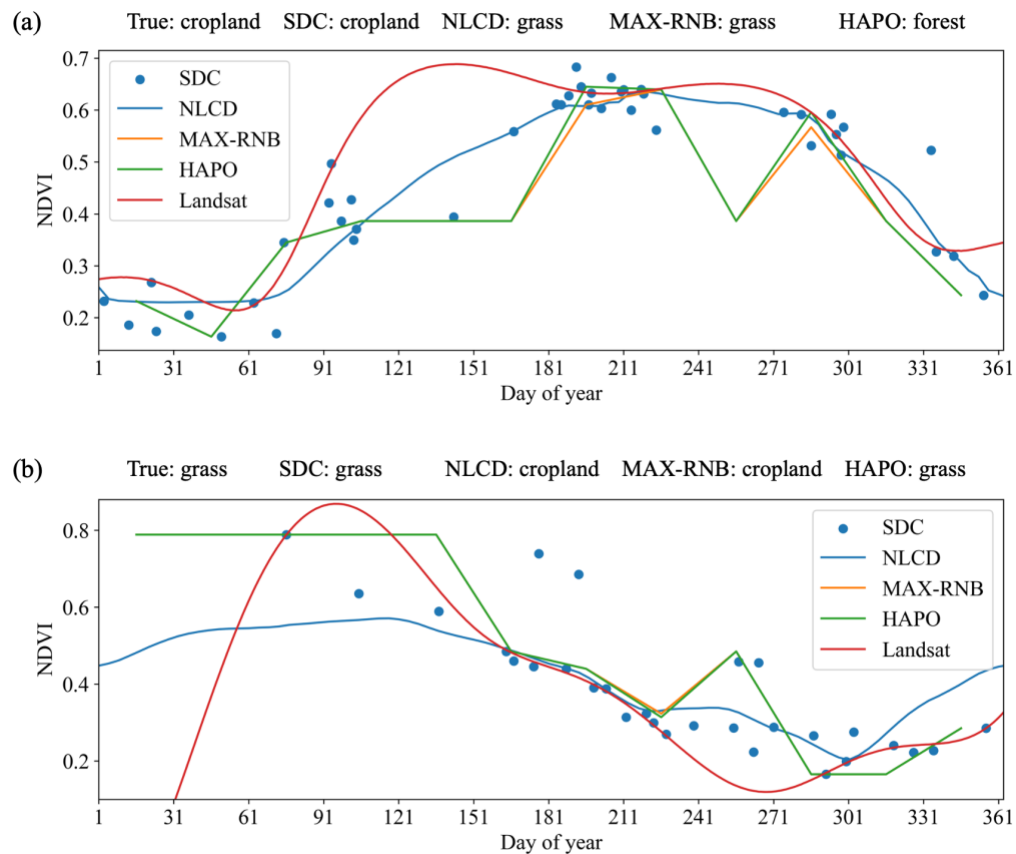

**Figure 20:** Examples of land cover classification results using different input data: (a) ground truth is cropland; (b) ground truth is grass.

## References

Brooks, E.B., Thomas, V.A., Wynne, R.H., Coulston, J.W., 2012. Fitting the Multitemporal Curve: A Fourier Series Approach to the Missing Data Problem in Remote Sensing Analysis. *IEEE Trans. Geosci. Remote Sensing* 50, 3340–3353. <https://doi.org/10.1109/TGRS.2012.2183137>

Che, X., Zhang, H.K., Li, Z.B., Wang, Y., Sun, Q., Luo, D., Wang, H., 2024. Linearly interpolating missing values in time series helps little for land cover classification using recurrent or attention networks. *ISPRS Journal of Photogrammetry and Remote Sensing* 212, 73–95. <https://doi.org/10.1016/j.isprsjprs.2024.04.021>

Chen, Y., Cao, R., Chen, J., Liu, L., Matsushita, B., 2021. A practical approach to reconstruct high-quality Landsat NDVI time-series data by gap filling and the Savitzky–Golay filter. *ISPRS Journal of Photogrammetry and Remote Sensing* 180, 174–190. <https://doi.org/10.1016/j.isprsjprs.2021.08.015>

Defourny, P., Bontemps, S., Bellemans, N., Cara, C., Dedieu, G., Guzzonato, E., Hagolle, O., Inglada, J., Nicola, L., Rabaute, T., Savinaud, M., Udroui, C., Valero, S., Bégué, A., Dejoux, J.-F., El Harti, A., Ezzahar, J., Kussul, N., Labbassi, K., Lebourgeois, V., Miao, Z., Newby, T., Nyamugama, A., Salh, N., Shelestov, A., Simonneaux, V., Traore, P.S., Traore, S.S., Koetz, B., 2019. Near real-time agriculture monitoring at national scale at parcel resolution: Performance assessment of the Sen2-Agri automated system in various cropping systems around the world. *Remote Sensing of Environment* 221, 551–568. <https://doi.org/10.1016/j.rse.2018.11.007>

Inglada, J., Vincent, A., Arias, M., Tardy, B., Morin, D., Rodes, I., 2017. Operational High Resolution Land Cover Map Production at the Country Scale Using Satellite Image Time Series. *Remote Sensing* 9, 95. <https://doi.org/10.3390/rs9010095>

Malambo, L., Heatwole, Conrad.D., 2016. A Multitemporal Profile-Based Interpolation Method for Gap Filling Nonstationary Data. *IEEE Trans. Geosci. Remote Sensing* 54, 252–261. <https://doi.org/10.1109/TGRS.2015.2453955>

Pahlevan, N., Sarkar, S., Devadiga, S., Wolfe, R.E., Roman, M., Vermote, E., Lin, G., Xiong, X., 2017. Impact of Spatial Sampling on Continuity of MODIS–VIIRS Land Surface Reflectance Products: A Simulation Approach. *IEEE Trans. Geosci. Remote Sensing* 55, 183–196. <https://doi.org/10.1109/TGRS.2016.2604214>

Shen, H., Li, X., Cheng, Q., Zeng, C., Yang, G., Li, H., Zhang, L., 2015. Missing Information Reconstruction of Remote Sensing Data: A Technical Review. *IEEE Geoscience and Remote Sensing Magazine* 3, 61–85. <https://doi.org/10.1109/MGRS.2015.2441912>

Tran, K.H., Zhang, H.K., McMaine, J.T., Zhang, X., Luo, D., 2022. 10 m crop type mapping using Sentinel-2 reflectance and 30 m cropland data layer product. *International Journal of Applied Earth Observation and Geoinformation* 107, 102692. <https://doi.org/10.1016/j.jag.2022.102692>

Yan, L., Roy, D., 2018. Large-Area Gap Filling of Landsat Reflectance Time Series by Spectral-Angle-Mapper Based Spatio-Temporal Similarity (SAMSTS). *Remote Sensing* 10, 609. <https://doi.org/10.3390/rs10040609>

Yan, L., Roy, D.P., 2020. Spatially and temporally complete Landsat reflectance time series modelling: The fill-and-fit approach. *Remote Sensing of Environment* 241, 111718. <https://doi.org/10.1016/j.rse.2020.111718>

Zhu, X., Cai, F., Tian, J., Williams, T., 2018. Spatiotemporal Fusion of Multisource Remote Sensing Data: Literature Survey, Taxonomy, Principles, Applications, and Future Directions. *Remote Sensing* 10, 527. <https://doi.org/10.3390/rs10040527>

Zhu, X., Zhan, W., Zhou, J., Chen, X., Liang, Z., Xu, S., Chen, J., 2022. A novel framework to assess all-round performances of spatiotemporal fusion models. *Remote Sensing of Environment* 274, 113002. <https://doi.org/10.1016/j.rse.2022.113002>

Zhu, Z., Woodcock, C.E., Holden, C., Yang, Z., 2015b. Generating synthetic Landsat images based on all available Landsat data: Predicting Landsat surface reflectance at any given time. *Remote Sensing of Environment* 162, 67–83. <https://doi.org/10.1016/j.rse.2015.02.009>
