# Supplementary material for: Global 30-m seamless data cube (2000–2022) of land surface reflectance generated from Landsat-5,7,8,9 and MODIS Terra constellations
Source: Copernicus journal article supplement (doi:10.5194/essd-2024-178), 2024-06-17
Supplement: Supplementary file [file essd-2024-178-CC9-supplement.pdf]

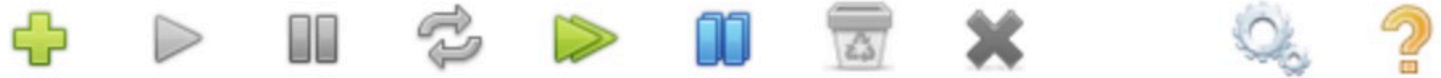

All Tasks

Recent

Downloading

Finished

Image

Video

Audio

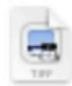

**CSDC30\_45RWQ\_2000-07.tif**

blob:https://data-starcloud.pcl.ac.cn/bee78cbd-f1a6-4491-b23e-4db7867179c3

142.68 MB

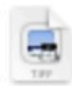

**CSDC30\_45RWQ\_2000-06 (1).tif**

blob:https://data-starcloud.pcl.ac.cn/922ef290-c04a-4e28-83b3-815e6cdea625

139.27 MB

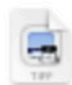

**CSDC30\_45RWQ\_2000-06.tif**

blob:https://data-starcloud.pcl.ac.cn/7b401a4b-b382-4740-bda4-081a885db890

139.27 MB
